# Supplementary material for: Neu-medullocytes, sialidase-positive B cells in the thymus, express autoimmune regulator (AIRE)
Source: PubMed Central journal article supplement (PMC6351566; doi:10.1038/s41598-018-37225-y), 2019-01-29
Supplement: 41598_2018_37225_MOESM1_ESM.pdf [file 41598_2018_37225_MOESM1_ESM.pdf]

## **Supplementary Figures**

### **Neu-medullocytes, sialidase-positive B cells in the thymus, express autoimmune regulator (AIRE)**

Shigeko Kijimoto-Ochiai<sup>1,2,\*</sup>, Keiko Kamimura<sup>1</sup> and Toshiaki Koda<sup>1,\*</sup>

<sup>1</sup> Faculty of Advanced Life Science, Hokkaido University, N21 W11, Kitaku, Sapporo 001-0021, Japan

<sup>2</sup> Present address: Life Space COSMOS, Hirosaki, 036-8222, Japan

\* 1<sup>st</sup> Corresponding author (T.K.): E-mail: t-koda@sci.hokudai.ac.jp

Tel.: +81-11-706-9062, Fax: +81-11-706-9210

\* 2<sup>nd</sup> Corresponding author (S.K.-O.): E-mail: cosmosko060@me.com

Tel. and Fax: +81-172-88-6636.

**Supplementary Figure S1**

**Supplementary Figure S2**

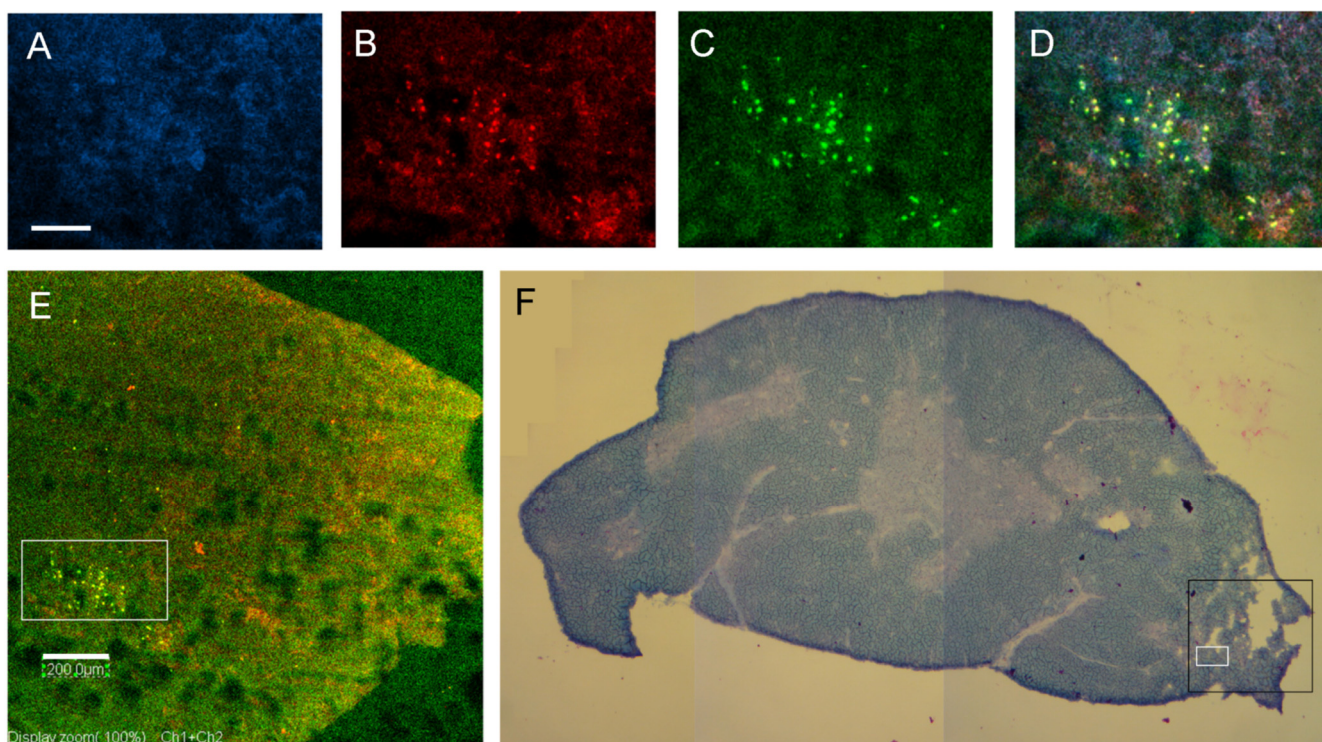

**Supplementary Figure S1. IgG-positive cells in the thymus.**

Thymus sections from an AKR mouse (4W, male) were stained with fluorescein-labeled antibodies and X-NANA and observed, X-NANA (**A**), R.R.-anti-mouse IgG (**B**), FITC-MHC class II (**C**) and merged (**D**). **E**, merged image of R.R.-anti-mouse IgG and FITC-MHC class II at lower magnification. **F**, Giemsa stained section, the black open square in F corresponds to the area of E. The white open square in E and F corresponds to the area of A-D. Scale bar in A is 100 µm for A-D. Scale bar in E is 200 µm.

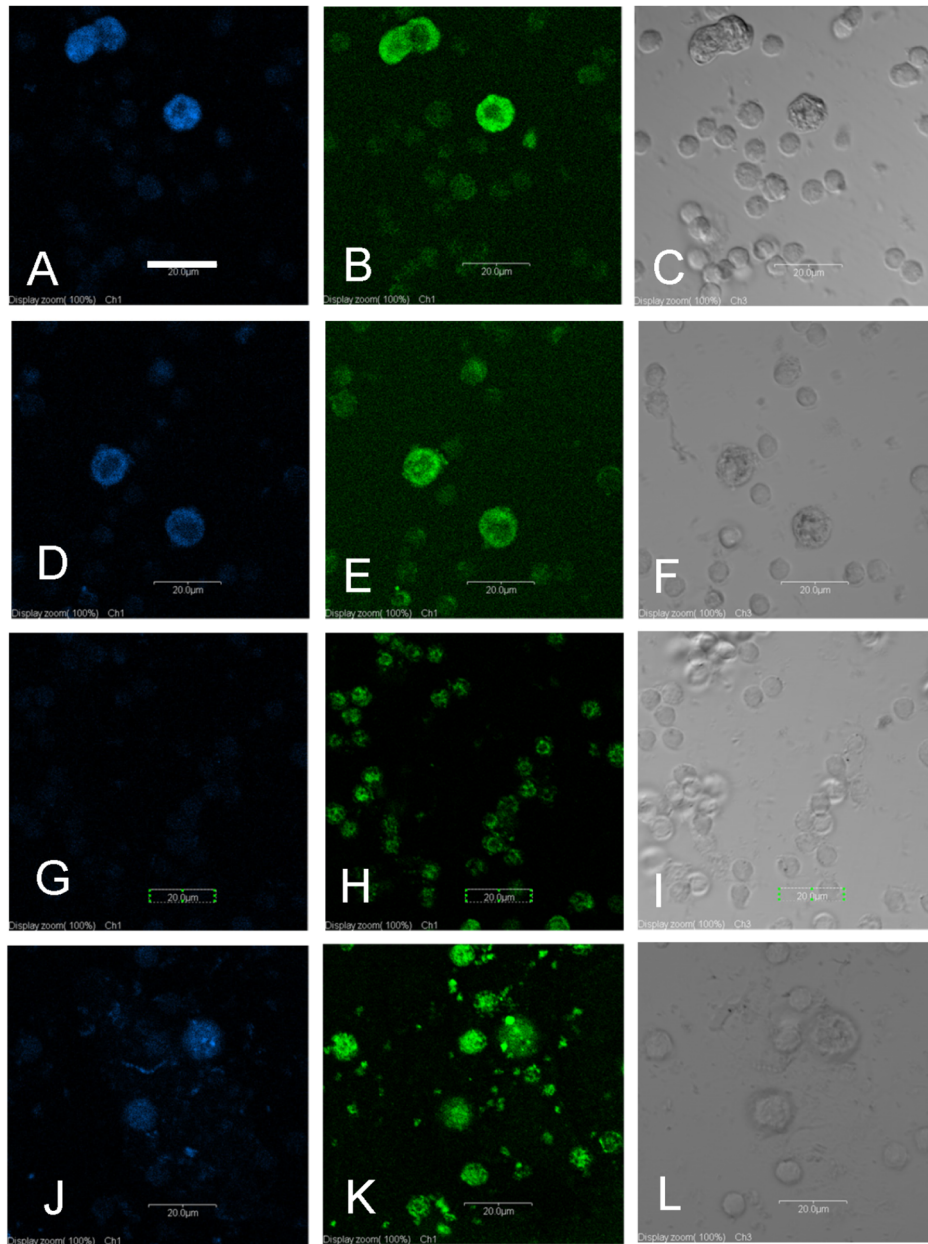

**Supplementary Figure S2. The shapes of sialidase positive cells in enzyme treated fractions.**

Cells were prepared from the thymuses of C57BL/6 (male, 6W) by enzyme treatment as described in the Methods section. The cells from the T (total thymocyte) or E (E1+E2) fraction were stained with X-NANA and FITC-anti-mouse IgG or with the FITC-anti-Aire system, and were observed as follows. **A-C**: T fraction, stained with X-NANA (**A**); anti-mouse IgG (**B**); or DIC (**C**). **D-F**: E fraction, stained with X-NANA (**D**); anti-mouse IgG (**E**); or DIC (**F**). **G-I**: T fraction, stained with X-NANA (**G**); FITC-anti-AIRE (**H**); or DIC (**I**). **J-L**: E fraction, stained with X-NANA (**J**); FITC-anti-AIRE (**K**); or DIC (**L**). Scale bars in A is 20  $\mu\text{m}$  for all images.
